# Supplementary material for: In vitrobiological andin silicoscreening of novel iron(iii) complexes for DNA-targeted antitumor drug component
Source: Royal Society of Chemistry journal article supplement (doi:10.1039/d3nj00016h), 2023-01-01
Supplement: d3nj00016h1.pdf [file d3nj00016h1.pdf]

## Supplementary Materials

### ***In vitro* biological and *in silico* screening of the novel iron(III) complexes for DNA-targeted antitumor drug component**

Serap Nigdelioglu Dolanbay<sup>1</sup>, Zehra Kübra Yilmaz<sup>1</sup>, Büşra Kaya<sup>2\*</sup>, Belma Aslim<sup>1</sup>, Bahri Ülküseven<sup>2</sup>

<sup>1</sup>*Gazi University, Faculty of Science, Department of Biology, 06500 Ankara, Turkey*

<sup>2</sup>*Department of Chemistry, Engineering Faculty, Istanbul University-Cerrahpasa, 34320, Avcilar, Istanbul, Turkey*

**Table S1.** SMILES notations of complexes from Cheminfo software.

| Complexes | SMILES notations*                                                                    |
|-----------|--------------------------------------------------------------------------------------|
| Fe1       | <chem>c1ccc2c(c1)O[Fe]13(OC(=C(C(c4ccccc4)OC)C(=[N]1N=C(SC)[N]3=C2)C)C)Cl</chem>     |
| Fe2       | <chem>c1(ccc2c(c1)O[Fe]13(OC(=C(C(c4ccccc4)OC)C(=[N]1N=C(SC)[N]3=C2)C)C)Cl)OC</chem> |

\* SMILES notations used in Molinspiration and PASS online software.

**Table S2.** Selected supercoiled pBR322 DNA cleavage data in the presence of varying concentrations of complex **Fe1** in Fig. 7.

| Lane no. | Reaction conditions     | Form I (%) | Form II (%) |
|----------|-------------------------|------------|-------------|
| 0        | DNA                     | 87.5       | 12.5        |
| 1        | DNA+ Fe1 (500 $\mu$ M)  | 83.3       | 16.7        |
| 2        | DNA+ Fe1 (750 $\mu$ M)  | 71.1       | 28.9        |
| 3        | DNA+ Fe1 (1000 $\mu$ M) | 80.7       | 19.3        |
| 4        | DNA+ Fe1 (1500 $\mu$ M) | 66.9       | 33.1        |
| 5        | DNA+ Fe1 (2500 $\mu$ M) | 22.5       | 77.5        |

**Table S3.** Selected supercoiled pBR322 DNA cleavage data in the presence of varying concentrations of complex **Fe2** in Fig. 7.

| Lane no. | Reaction conditions     | Form I (%) | Form II (%) |
|----------|-------------------------|------------|-------------|
| 0        | DNA                     | 90.2       | 9.8         |
| 1        | DNA+ Fe2 (500 $\mu$ M)  | 86.4       | 13.6        |
| 2        | DNA+ Fe2 (750 $\mu$ M)  | 84.3       | 15.7        |
| 3        | DNA+ Fe2 (1000 $\mu$ M) | 81.5       | 18.5        |
| 4        | DNA+ Fe2 (1500 $\mu$ M) | 83.9       | 16.1        |
| 5        | DNA+ Fe2 (2500 $\mu$ M) | 75.4       | 24.6        |

**Table S4.** The optimized geometrical parameters of Fe(III) complexes 1 and 2 in the ground state at the B3LYP/LANL2DZ level, together with the published crystal data<sup>1</sup>.

| <b>Bond length (Å)</b>  | <b>Calculated</b> |            | <b>Experimental</b>                  |
|-------------------------|-------------------|------------|--------------------------------------|
| <b>Complexes</b>        | <b>Fe1</b>        | <b>Fe2</b> | <b>Similar structure<sup>1</sup></b> |
| Fe1-O1                  | 1.872             | 1.872      | 1.897(2)                             |
| Fe1-O3                  | 1.877             | 1.876      | 1.907(2)                             |
| Fe1-N1                  | 1.893             | 1.894      | 2.067(3)                             |
| Fe1-N3                  | 1.941             | 1.942      | 2.076(3)                             |
| Fe1-Cl1                 | 2.290             | 2.293      | 2.2146(11)                           |
| <b>Bond angle (deg)</b> |                   |            |                                      |
| O1-Fe1-O3               | 91.6              | 91.6       | 92.51(10)                            |
| O1-Fe1-N1               | 89.3              | 89.4       | 87.07(10)                            |
| O3-Fe1-N1               | 167.0             | 167.0      | 144.71(11)                           |
| O1-Fe1-N3               | 158.4             | 158.3      | 147.74(11)                           |
| O3-Fe1-N3               | 91.2              | 91.1       | 87.47(11)                            |
| N1-Fe1-N3               | 83.2              | 83.2       | 74.99(11)                            |
| O1-Fe1-Cl1              | 102.4             | 102.4      | 108.50(8)                            |
| O3-Fe1-Cl1              | 100.3             | 100.5      | 108.66(9)                            |
| N1-Fe1-Cl1              | 92.2              | 92.0       | 104.86(8)                            |
| N3-Fe1-Cl1              | 98.7              | 98.8       | 102.00(9)                            |

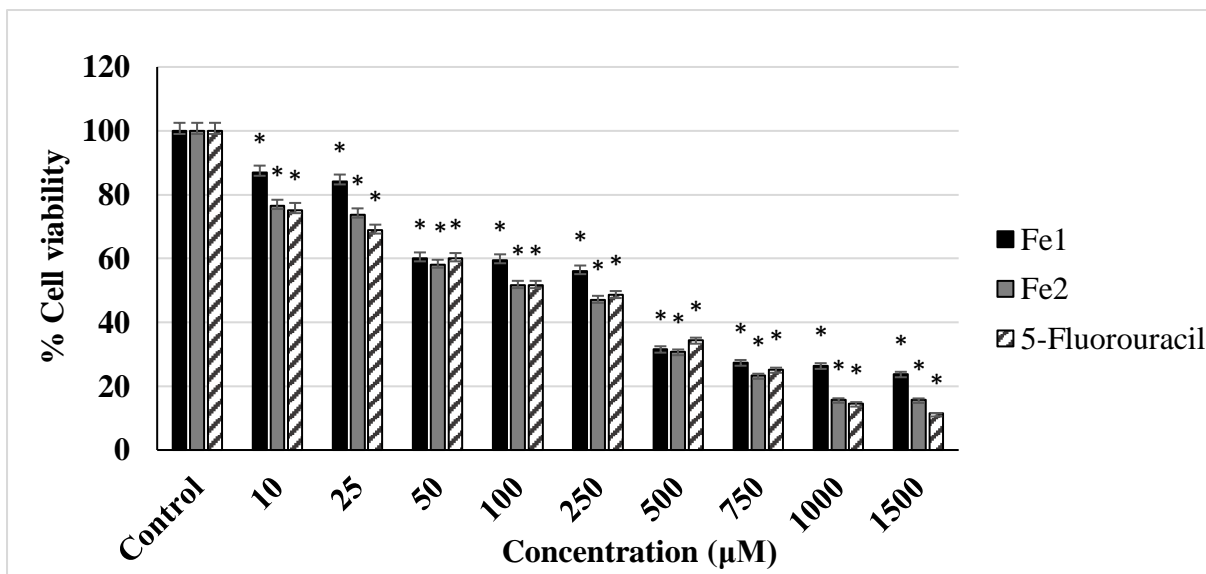

**Figure S1a.** The effects of complexes **Fe1**, **Fe2** and 5-Fluorouracil on viability of HT-29 cell line for 24 h. Results are represented as mean of three replicates  $\pm$  standard deviation. \* $p < 0.05$  compared to control.

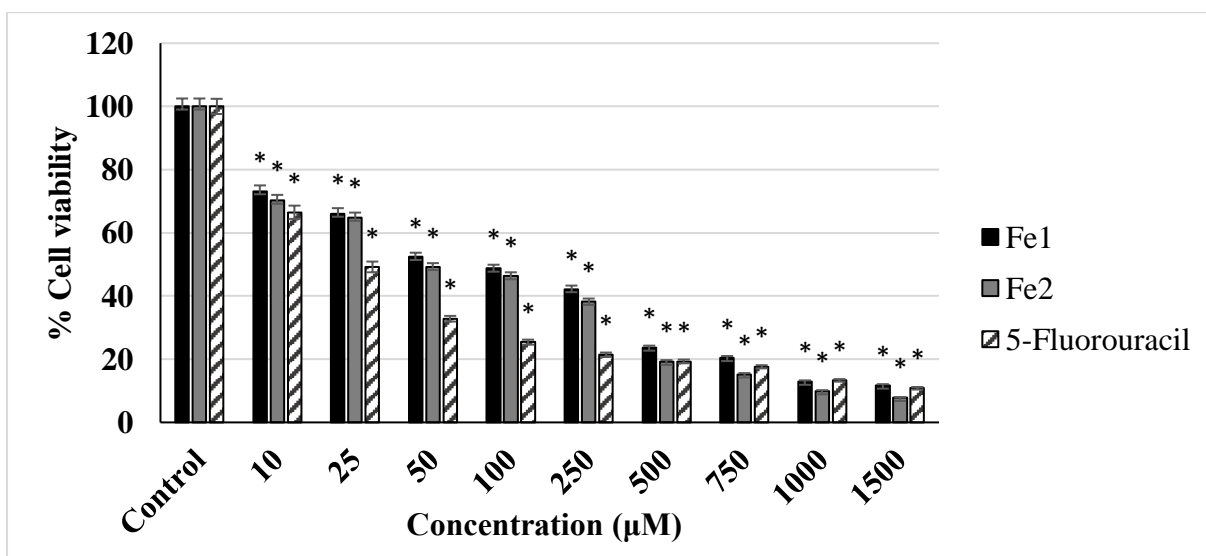

**Figure S1b.** The effects of complexes **Fe1**, **Fe2** and 5-Fluorouracil on viability of HT-29 cell line for 48 h. Results are represented as mean of three replicates  $\pm$  standard deviation. \* $p < 0.05$  compared to control.

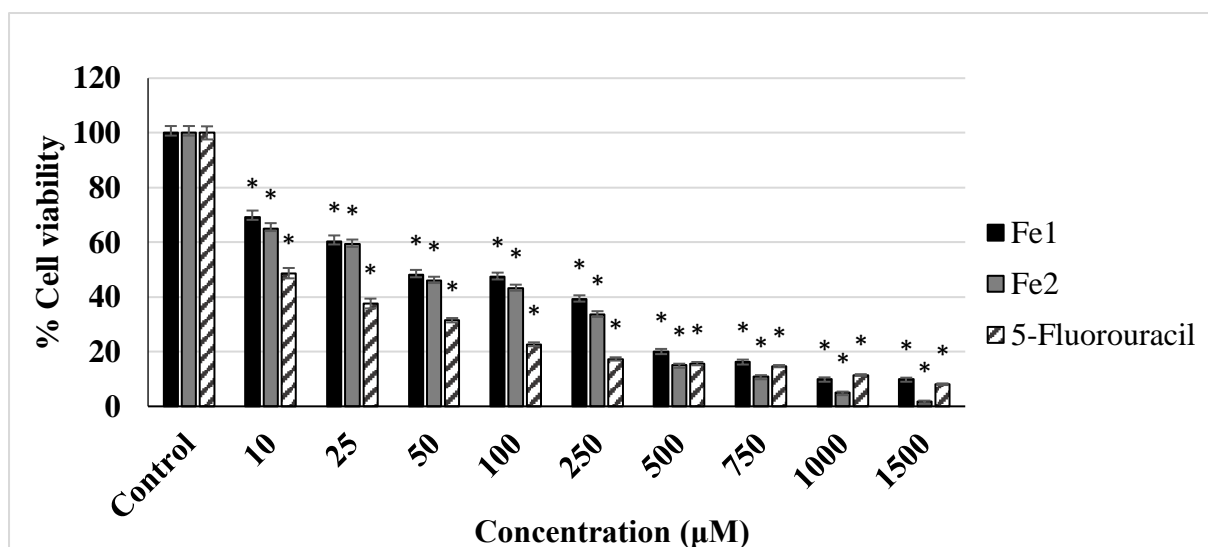

**Figure S1c.** The effects of complexes **Fe1**, **Fe2** and 5-Fluorouracil on viability of (a) HT-29 cell line for 72 h. Results are represented as mean of three replicates  $\pm$  standard deviation.  $*p < 0.05$  compared to control.

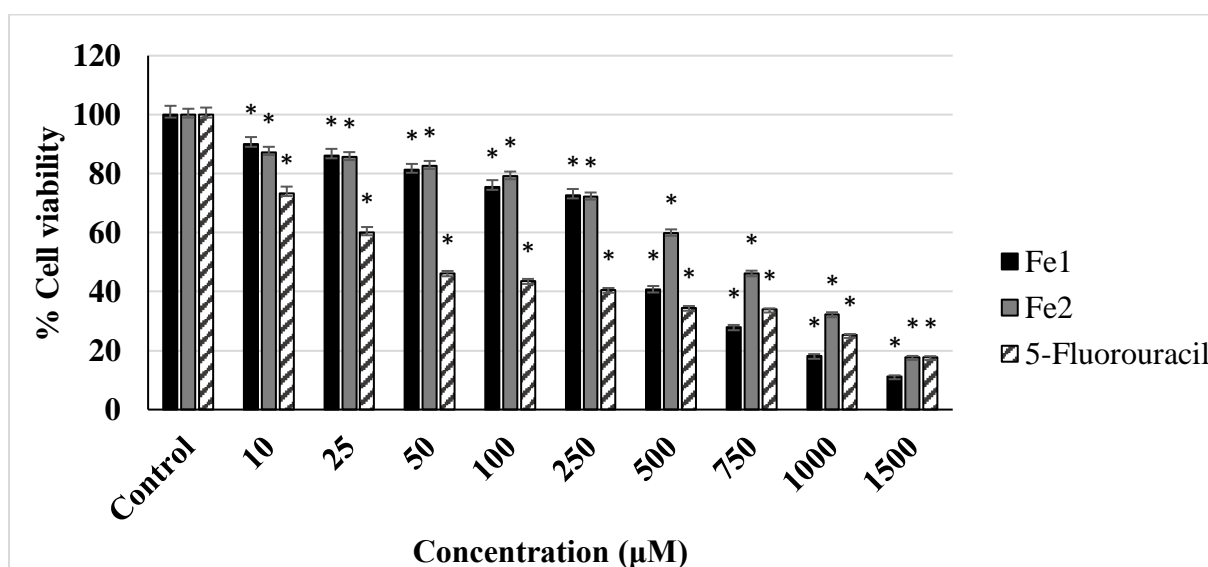

**Figure S2a.** The effects of complexes **Fe1**, **Fe2** and 5-Fluorouracil on viability of HeLa cell line for 24 h. Results are represented as mean of three replicates  $\pm$  standard deviation.  $*p < 0.05$  compared to control.

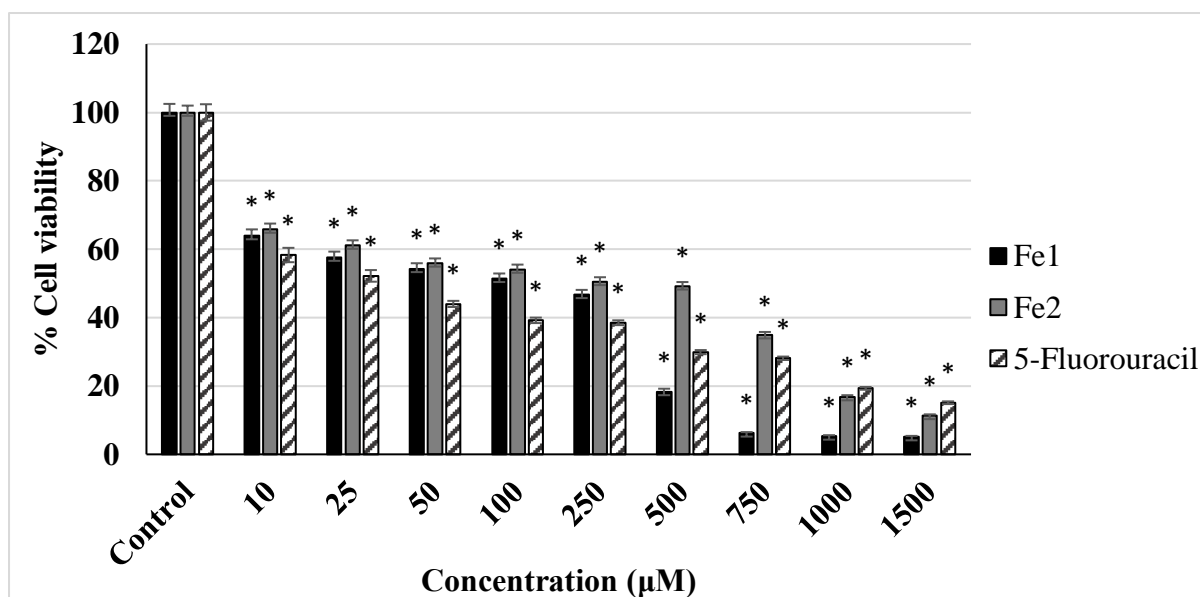

**Figure S2b.** The effects of complexes **Fe1**, **Fe2** and 5-Fluorouracil on viability of HeLa cell line for 48 h. Results are represented as mean of three replicates  $\pm$  standard deviation. \* $p < 0.05$  compared to control.

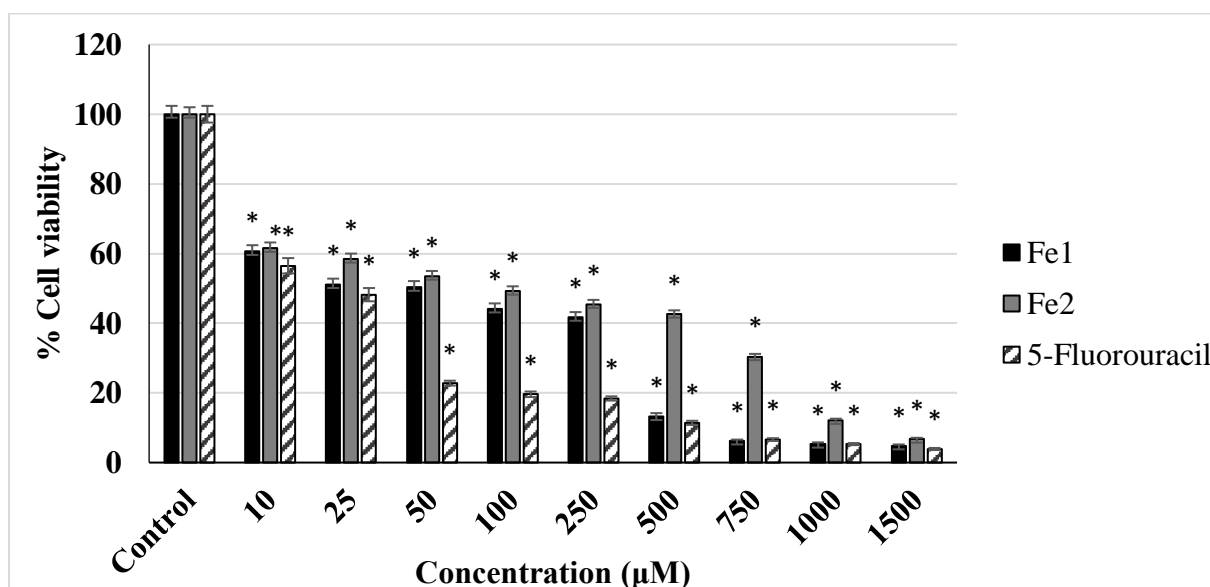

**Figure S2c.** The effects of complexes **Fe1**, **Fe2** and 5-Fluorouracil on viability of HeLa cell line for 72 h. Results are represented as mean of three replicates  $\pm$  standard deviation. \* $p < 0.05$  compared to control.

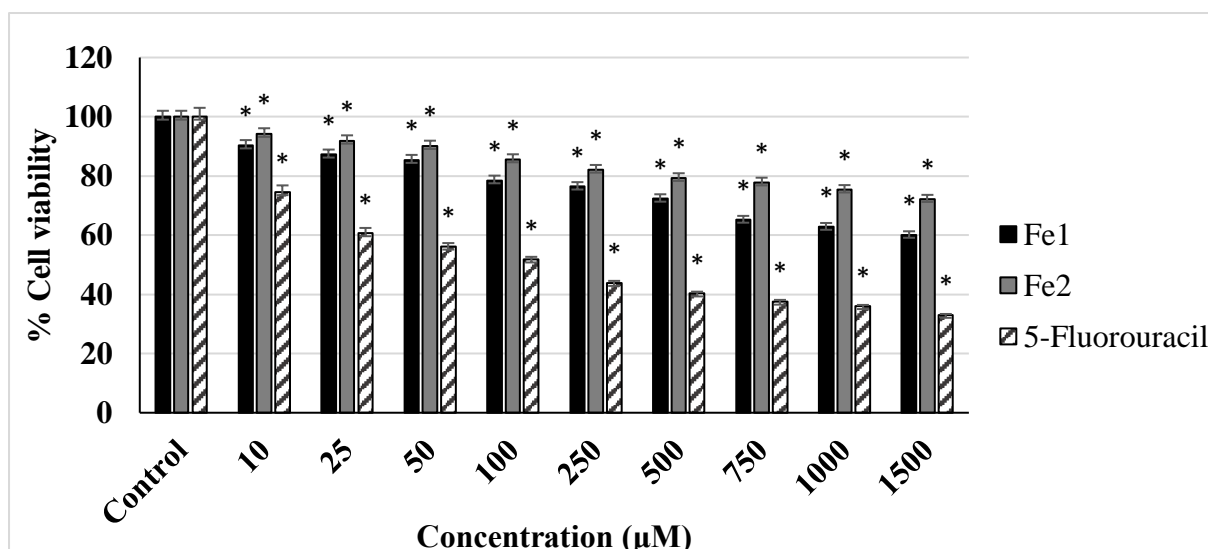

**Figure S3a.** The effects of complexes **Fe1**, **Fe2** and 5-Fluorouracil on viability of L929 cell line for 24 h. Results are represented as mean of three replicates  $\pm$  standard deviation.  $*p < 0.05$  compared to control.

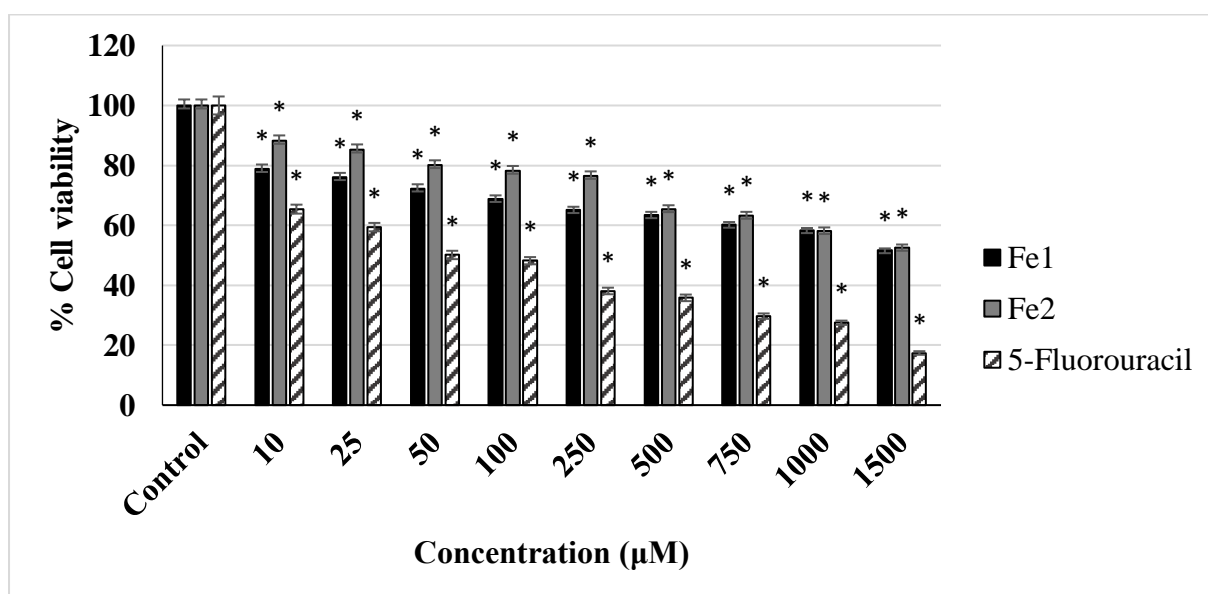

**Figure S3b.** The effects of complexes **Fe1**, **Fe2** and 5-Fluorouracil on viability of L929 cell line for 48 h. Results are represented as mean of three replicates  $\pm$  standard deviation.  $*p < 0.05$  compared to control.

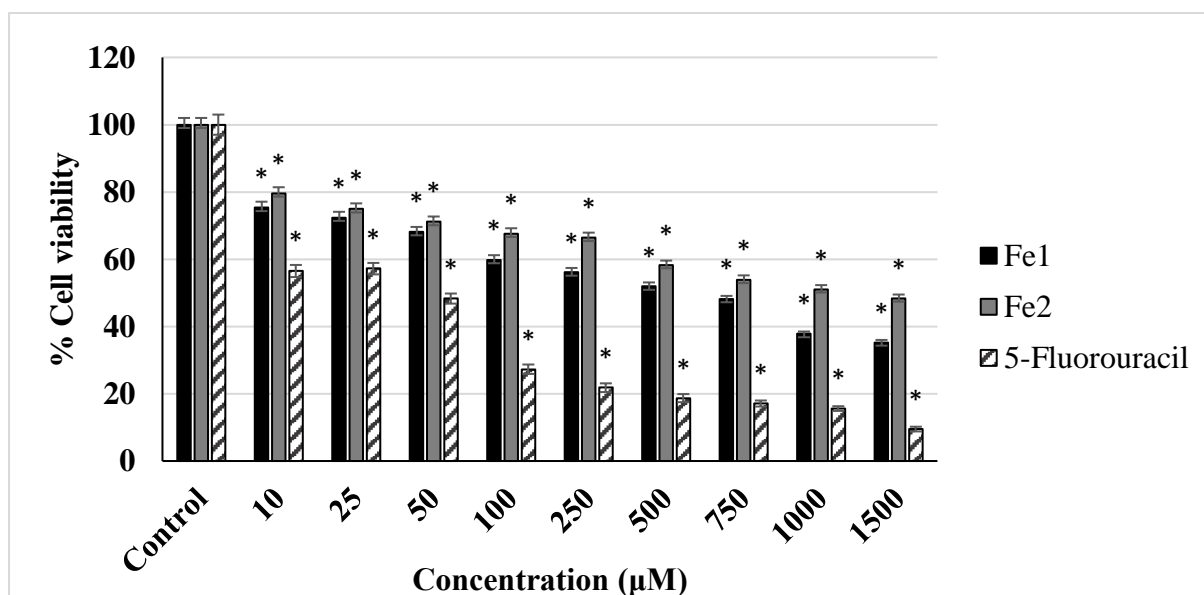

**Figure S3c.** The effects of complexes **Fe1**, **Fe2** and 5-Fluorouracil on viability of L929 cell line for 72 h. Results are represented as mean of three replicates  $\pm$  standard deviation. \* $p < 0.05$  compared to control.

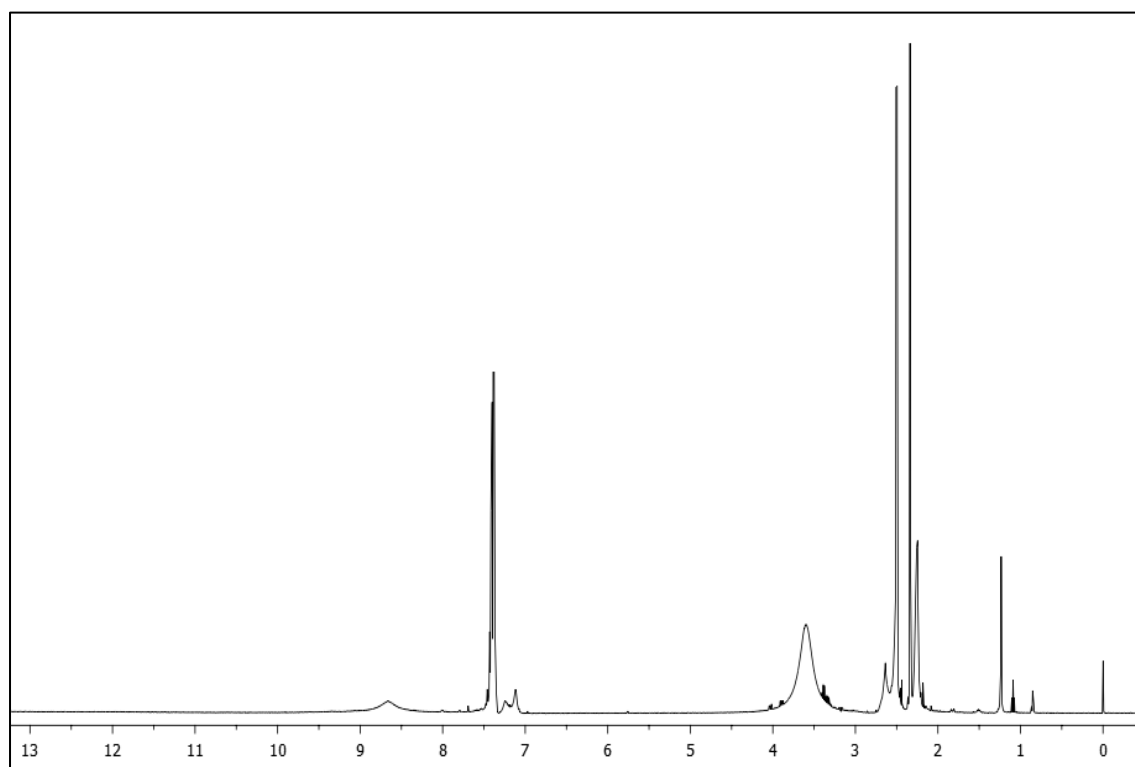

**Figure S4.**  $^1\text{H}$  NMR spectrum of 3-benzylidene-2,4-pentanedione-S-methylthiosemicarbazone hydrogen iodide in  $\text{DMSO-d}_6$ .



Fe1 #68-76 RT: 1.89-2.09 AV: 9 NL: 3.27E8  
T: + c ESI ms [ 50.00-2000.00]

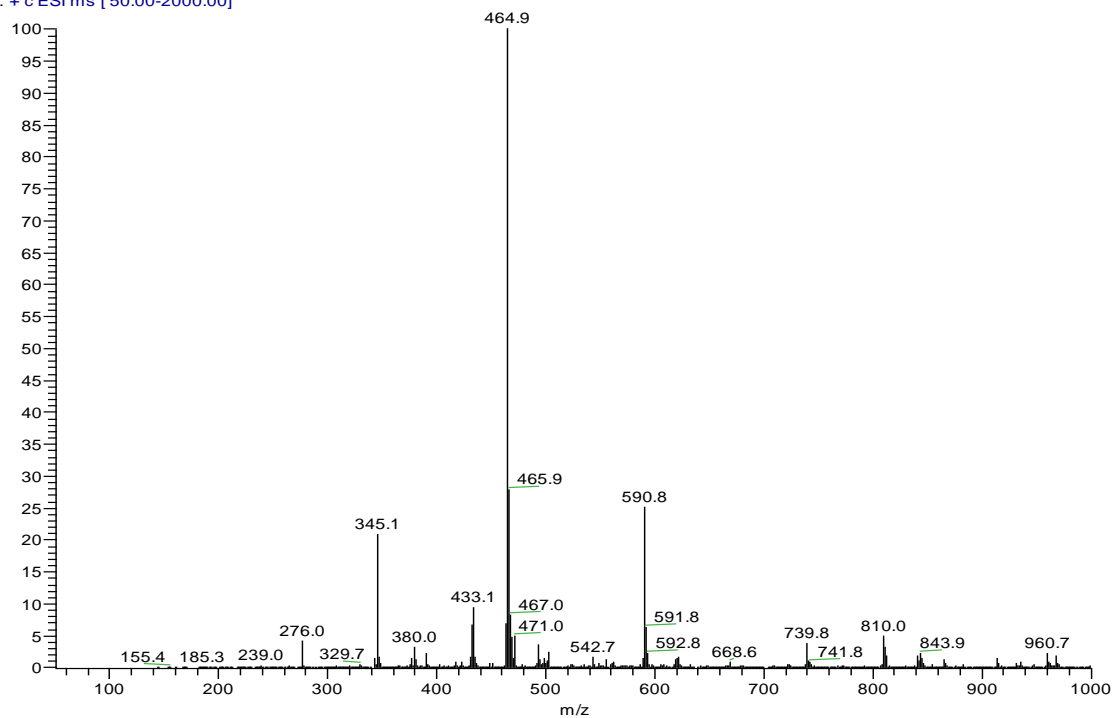

Figure S5. ESI-MS of Fe1 in CHCl<sub>3</sub>.

Fe2 #110-134 RT: 2.99-3.60 AV: 25 NL: 2.39E8  
T: + c ESI ms [ 50.00-2000.00]

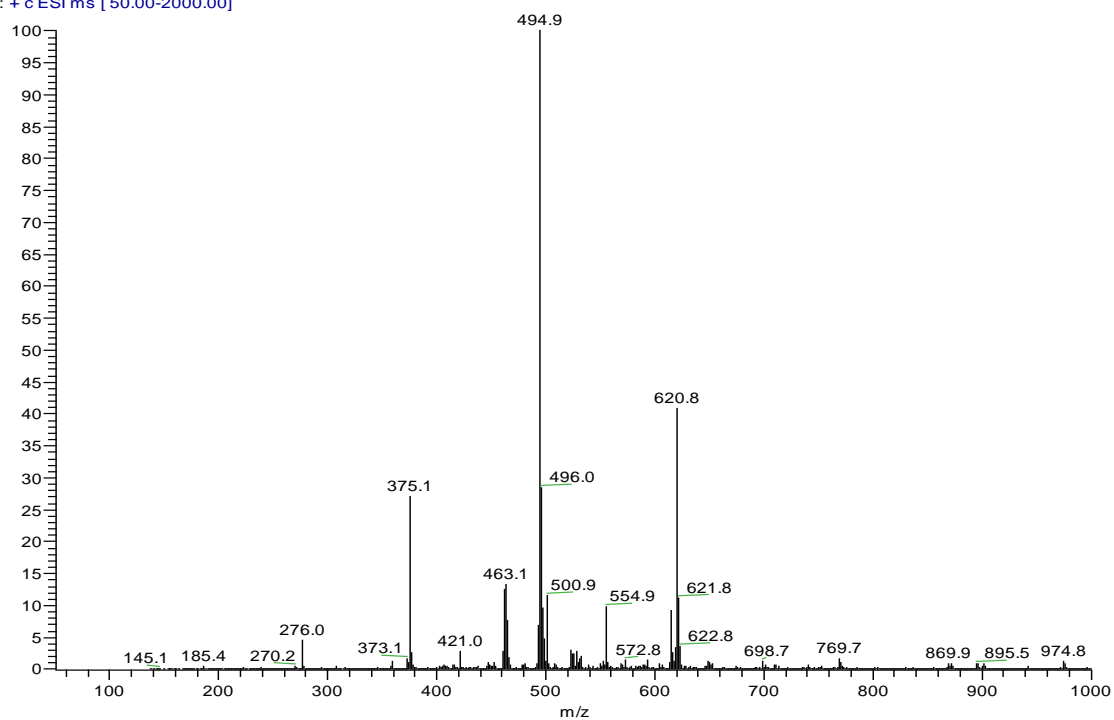

Figure S6. ESI-MS of Fe2 in CHCl<sub>3</sub>.

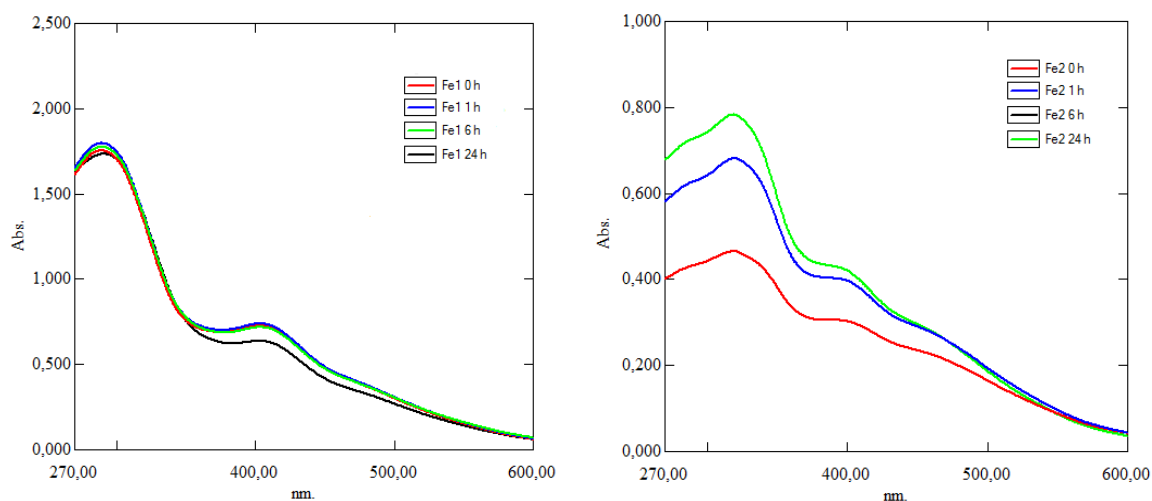

**Figure S7.** UV-Visible spectra of **Fe1** and **Fe2** in 1% DMSO-water mixture.

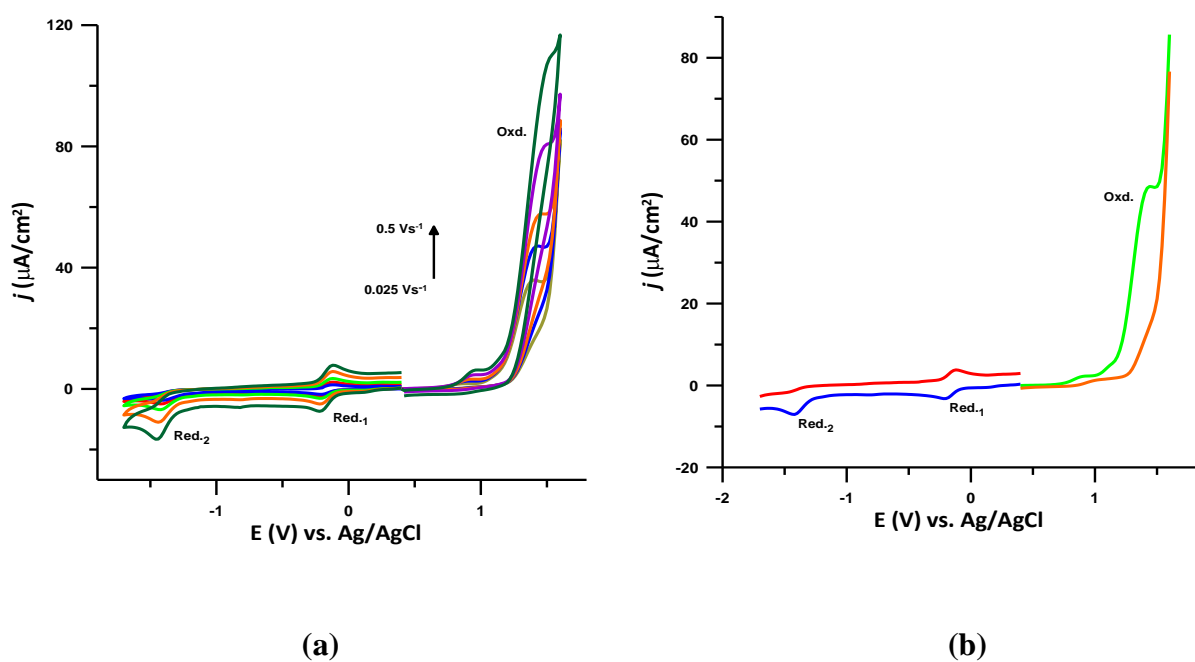

**Figure S8.** CVs of **Fe1** ( $1.0 \times 10^{-3}$  M) at different scan rates (0.025, 0.05, 0.1, 0.25, 0.5  $\text{Vs}^{-1}$ ) (a) and LSVs at a scan rate of 0.1  $\text{Vs}^{-1}$  in 0.1 M TBAP/DMSO solution on GC working electrode (b).

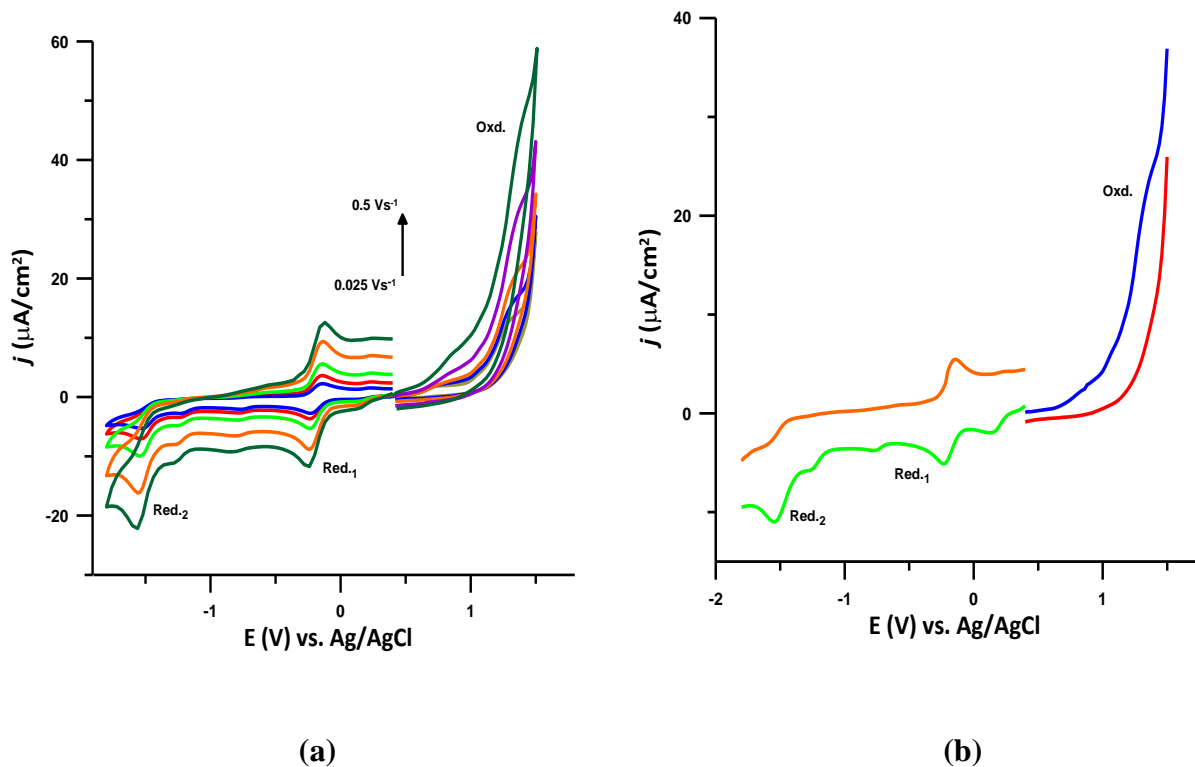

**Figure S9.** CVs of Fe<sup>2+</sup> (1.0 × 10<sup>-3</sup> M) at different scan rates (0.025, 0.05, 0.1, 0.25, 0.5 V s<sup>-1</sup>) (a) and LSVs at a scan rate of 0.1 V s<sup>-1</sup> in 0.1 M TBAP/DMSO solution on GC working electrode (b).

## References

1. B. A. Arslan, B. Kaya, O. Şahin, S. Baday, C. C. Saylan and B. Ülküseven, *J. Mol. Struct.*, 2021, **1246**, 131166.
